# Supplementary material
Source: PubMed Central journal article supplement (PMC2760117)
Supplement: emboj2009241s1.pdf [file emboj2009241s1.pdf]

## Supplementary information

### Supplementary Materials and Methods

#### Recombinant protein production and purification

6xHis-tagged NEMO derivatives and GST(Ub)<sub>4</sub> proteins were produced in E.Coli Rosetta II strain (Novagen) using ZYM-5052 auto-induction culture medium (Studier, 2005) for 42 hours at 30°C. 250 ml of bacterial culture were centrifuged and the pellets were resuspended in a buffer containing 50 mM Tris pH 7.5, 20 mM KCl, 0.2 mM DTE, 1 mg/ml and 5% glycerol. After sonication, Triton X-100 was added (1% final concentration) and following 1 hour rocking at 4°C, lysates were centrifuged. The cleared bacterial lysates obtained were used for protein purification. NEMO polypeptides were purified using His-Trap columns (GE Healthcare) according to the manufacturer's instruction. Eluted proteins were dialyzed overnight at 4°C against a buffer containing 50 mM Tris pH 8.0, 100 mM KCl, 0.2 mM DTE and 0.1 mM DDM. Glycerol was then added to 20% final concentration and proteins were stored at at -80°C until use. For fluorescence measurements, recombinant proteins were further purified as previously described (Agou et al, 2002). GST(Ub)<sub>4</sub> and GST(Ub)<sub>9</sub> were produced similarly except that glutathione-agarose beads (Sigma) were used for purification. GST fusion proteins were either left bound to the beads and frozen at -20°C in a buffer containing 50 mM Tris pH 7.5, 150 mM NaCl and 20% glycerol. Alternatively, the proteins were eluted from the beads with 20 mM reduced glutathione, 50mM Tris (pH 8,0), dialysed against a buffer containing 50mM Tris (pH 7,5), 150 mM NaCl and 0,5 mM DTE and frozen at -20°C until use. Removal of the GST moiety was done by cleavage with sepharose-immobilized thrombin (Calbiochem) and GST was finally removed by further incubation with glutathione-agarose beads. Protein concentrations were determined by absorption at 280nm, and purity was verified by SDS-PAGE and Coomassie staining.

#### Fluorescence spectroscopy

The dissociation constants ( $K_D$ ) of the CC2-LZ(F312W), NOA and NOAZ peptides were determined by fitting experimental curves using the Monte Carlo algorithm (pro Fit 6.1, Quantum Soft). Experimental data were fitted according to the following equations:

$$(F_{\text{obs}}-F_0)=(F_{\text{max}}-F_0)*(1-\alpha_{\text{bound}}) \quad (1)$$

where  $F_0$  represents the initial fluorescence intensity of a fraction of CC2-LZ(F312W) bound to polyubiquitin chains (polyUb) in the absence of competitor,  $F_{\max}$  is the fluorescence after saturation with the competitor (identical to the fluorescence of CC2-LZ(F312W) alone), and  $\alpha_{\text{bound}}$  is the molar fraction of CC2-LZ(F312W) bound to polyubiquitin chains. In our competitive binding assays, as the free concentration of polyUb cannot be approximated to the total concentration, we used a general equation previously described in (Wang, 1995) to determine the free molar fraction of F312W ( $1-\alpha_{\text{bound}}$ ), which can be expressed as:

$$1-\alpha_{\text{bound}} = [2\sqrt{a^2-3b} \cos(\theta/3) - a] / [3K_D^{F312W} + (2\sqrt{a^2-3b} \cos(\theta/3) - a)] \quad (2)$$

where

$$\theta = \arccos [(-2a^3 + 9ab - 27c) / (2\sqrt{(a^2-3b)^3})]$$

$$a = K_D^{F312W} + K_D + [F312W]_t + [\text{competitor}]_t - [\text{PolyUb}]_t$$

$$b = K_D ([F312W]_t - [\text{PolyUb}]_t) + K_D^{F312W} ([\text{competitor}]_t - [\text{PolyUb}]_t) + K_D^{F312W} K_D$$

$$c = -K_D^{F312W} K_D [\text{PolyUb}]_t$$

$[\text{PolyUb}]_t$  and  $[F312W]_t$  are total polyUb and CC2-LZ(F312W) concentration respectively,  $[\text{competitor}]_t$  is the total concentration of CC2-LZ or NOAZ,  $K_D^{F312W}$  the dissociation constant of the CC2-LZ(F312W) and  $K_D$  the dissociation constant of the competitor (CC2-LZ or NOAZ).

The fitted parameters used in equations (1) and (2) were  $F_{\max}$ ,  $F_0$ ,  $K_D^{F312W}$  and  $K_D$ . The  $K_D$  values which gave the best fitting for two independent concentrations of F312W (0.5 and 3  $\mu\text{M}$ ) are shown in Table 2.

## Supplementary figures

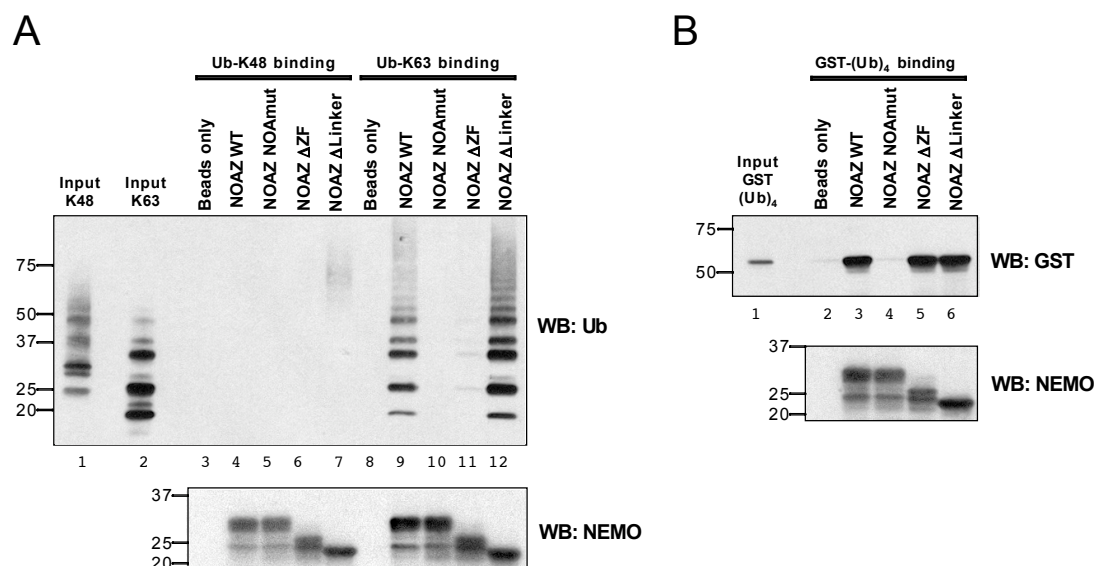

**Figure S1 : Mutations in the NOA domain or deletion of the Zinc Finger strongly reduce binding of NEMO to ubiquitin K63-linked chains, while binding to linear ubiquitin chains is only dependent on the NOA domain.** A) Histidine-tagged recombinant NOAZ domains of NEMO (purified as described in supplementary Materials and Methods) : WT (aa 215-412), NOAmut (215-412, Y301S D304N), ΔZF (215-386) and Δlinker (Δ339-386) bound to nickel-activated Sepharose beads were incubated with either K48- or K63-linked polyubiquitin chains (3-7 in length). After washing, recovered material was probed with an anti-ubiquitin antibody. B) Same as in A) except that binding reactions were done with GST(Ub)<sub>4</sub>. Recovered material was probed with an anti-GST antibody. The amount of each recombinant protein used for the binding assays was verified by reblotting the membranes with an anti-NEMO antibody. The input lanes correspond to 8% of the material used for the binding reactions. Note: high molecular weight species pulled down with ubiquitin K63-linked chains (lane 9 and 12) are enriched long K63-linked chains already present in the commercial preparation (and visible in the input lane upon overexposure, data not shown).

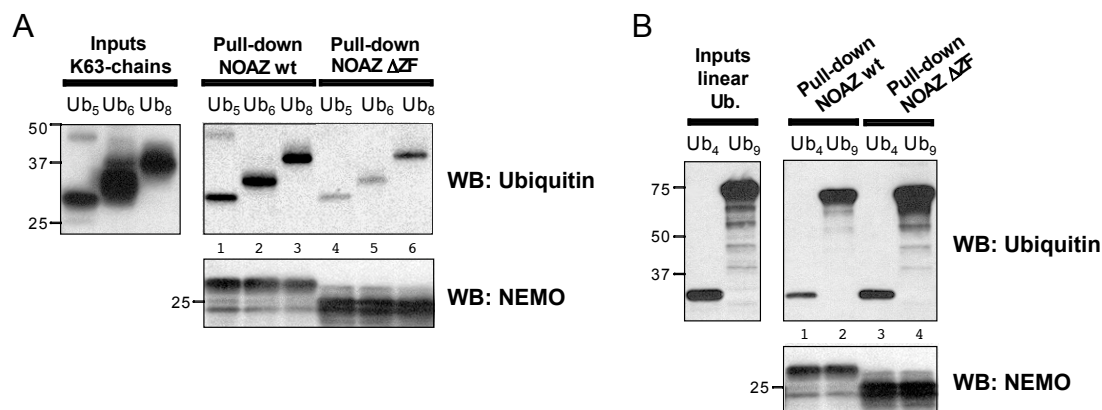

Figure S2 : **Pull-down experiments using recombinant NEMO polypeptides and fixed-length K63-linked or linear ubiquitin chains.** A) Histidine-tagged recombinant NOAZ domains (purified as described in supplementary Materials and Methods) : WT (aa 215-412) and  $\Delta$ ZF (215-386) bound to nickel-activated Sepharose beads were incubated with K63-linked penta-, hexa- and octa-ubiquitin (Ub<sub>5</sub>, Ub<sub>6</sub> and Ub<sub>8</sub> respectively). After washing, recovered material was probed with an anti-ubiquitin antibody. B) Same as in A) except that binding reactions were done with linear tetra- and nona-ubiquitin (Ub<sub>4</sub> and Ub<sub>9</sub> respectively). The amount of each recombinant protein used for the binding assays was verified by reblotting the membranes with an anti-NEMO antibody. The input lanes correspond to 8% of the material used for the binding reactions. Note that binding to K63-linked ubiquitin chains requires the ZF domain of NEMO, while binding to linear ubiquitin chains is ZF-independent (irrespective of the chain length).

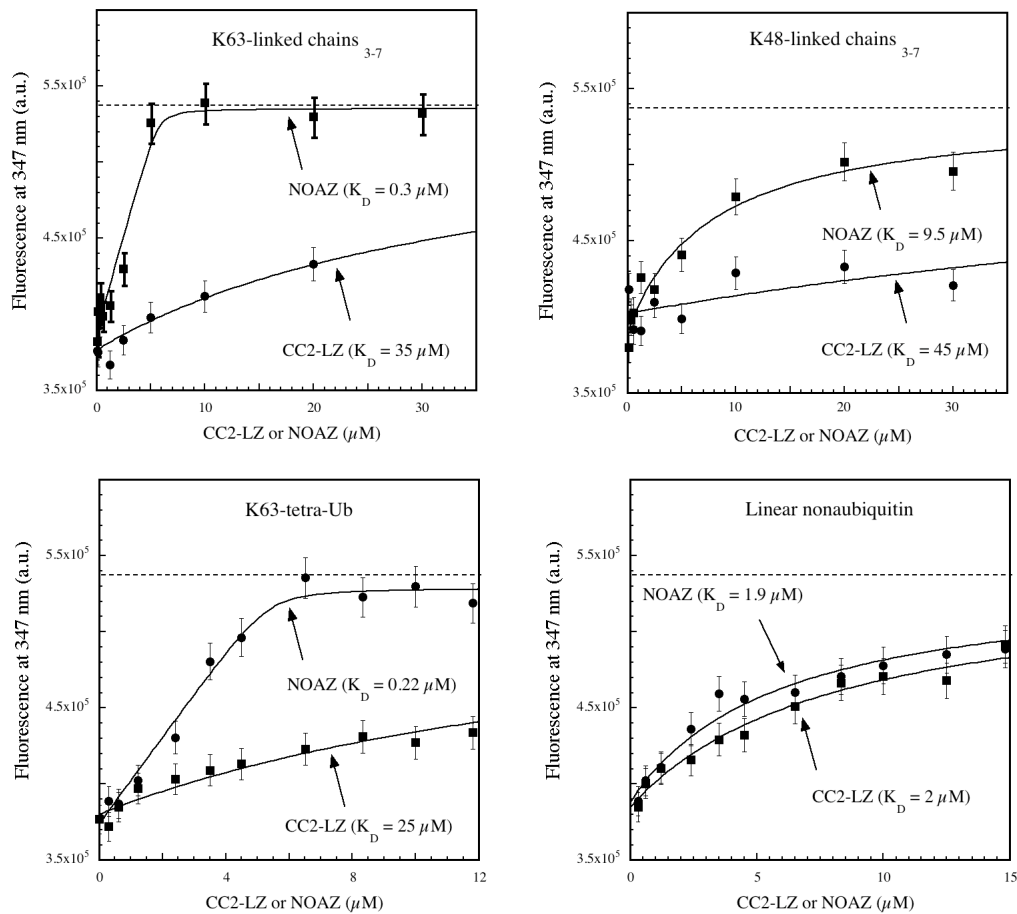

Figure S3 :Measurement of the  $K_D$  values of the CC2-LZ and NOAZ domains for K48-, K63-polyubiquitin<sub>3,7</sub>, K63 tetra-ubiquitin or linear nona-ubiquitin. Binding competitions of polyubiquitin chains (3 $\mu$ M) to CC2-LZ (3 $\mu$ M) were performed by using variable concentrations of CC2-LZ or NOAZ as described in Materials and Methods. Solid line represents fitted curves allowing to calculate the  $K_D$  values presented in Table 2 (derived from  $EC_{50}$  as described in supplementary Materials and Methods), while dashed line indicate the fluorescence after saturation with the competitor (identical to the fluorescence of F312W alone).

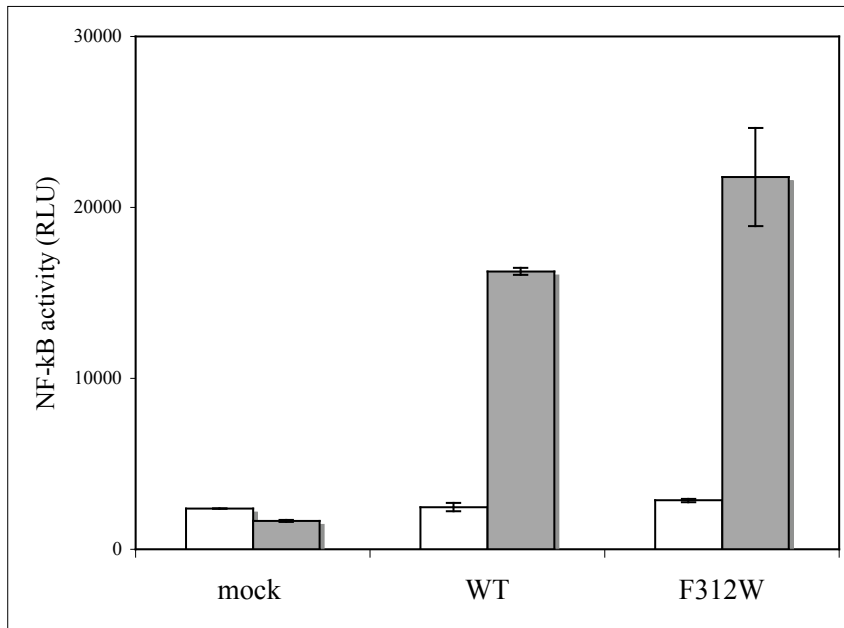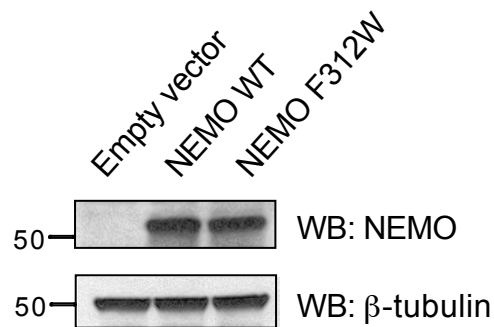

Figure S4 : **The F312W mutant of NEMO complements NF- $\kappa$ B-deficient cells as efficiently as wt NEMO.** NF- $\kappa$ B activation by TNF- $\alpha$  was measured in NEMO-deficient JM4.5.2 T cells following transfection with WT or F312W mutant NEMO together with a NF- $\kappa$ B-dependent firefly luciferase reporter construct and a control renilla luciferase-expressing plasmid. White bars : untreated cells, grey bars : TNF treated. A control western blot indicates that the level of expression of the WT and mutant NEMO proteins are identical.
